# Supplementary material
Source: ML conference proceedings conference paper supplement (https://openaccess.thecvf.com/content/CVPR2023/html/Ramaswamy_Overlooked_Factors_in_CVPR_2023_paper.html)
Supplement: Supplementary file 1 [file Ramaswamy_Overlooked_Factors_in_CVPR_2023_supplemental.pdf]

# Overlooked Factors in Concept-based Explanations: Dataset Choice, Concept Salience, and Human Capability

## Supplementary material

Anonymous CVPR submission

Paper ID 1118

In this supplementary document, we provide additional details on some sections of the main paper.

**Section A** We provide more information regarding our experimental setup over all experiments.

**Section B** We provide additional results from our experiments regarding probe dataset choice from Section 3 of the main paper.

**Section C** We provide additional results from our experiments regarding concept choice from Section 4 of the main paper.

**Section D:** We supplement Section 5 of the main paper and provide more information about our human studies.

**Section E:** We supplement Section 5 of the main paper and show snapshots of our full user interface.

### A. Experimental details

Here we provide additional experimental details regarding all our setups, as well as the computational power we needed.

**TCAV.** Using the features extracted from the penultimate layer of the ResNet18-based [4] model trained on the Places365 dataset [13], we use scikit-learn’s [10] LogisticRegression models to predict the ground truth attributes in each case. We use the liblinear solver, with an l2 penalty, and pick the regularization weight as a hyperparameter, based on the performance (ROC AUC) on a validation set.

**Baseline.** Given the ground-truth labelled concepts for an image, this explanation attempts to predict the blackbox model’s output on the image. We use scikit-learn’s [10] LogisticRegression model with a liblinear solver, and an l1 penalty, to prioritize learning simpler explanations. For the experiment reported in Section 3 of the main paper, we pick the regularization weight as a hyperparameter, choosing the weight with the best performance

on a validation set. When generating explanations of different complexities for our human studies, we vary the regularization parameter, picking explanations that use a total of 4, 8, 16, 32, or 64 concepts.

**Learning concepts.** We computed features for all images from ADE20k [14, 15] using the penultimate layer of a ResNet18 [4] model trained on Imagenet [11]. We then learned a linear model for all concepts that had over 10 positive samples within the dataset, using the LogisticRegression model from scikit-learn [10]. Similar to other models, we use a liblinear solver, with an l2 penalty, choosing the regularization weight based on performance (ROC AUC) on a validation set. As mentioned, we report the normalized AP [5] to be able to compare across concepts and target classes with varying base rates.

**Run times.** Computing each of the linear models used less than 2 min on a CPU. Computing features using a ResNet18 [4] model trained on either Places365 [13] or Imagenet [11] for the ADE20k [14, 15] and Pascal [2] datasets took less than 15 min using a NVIDIA GTX 2080 GPU.

### B. Probe dataset choice: more details

In our first claim, we show that the choice of probe dataset can have a significant impact on the explanation output for concept-based explanations. We give more details from our experiments for this claim within this section.

#### B.1. Varying the probe dataset

Here we provide the full results from section 3.1 in the main text, where we compute concept-based explanations using 2 different methods (NetDissect [1] and TCAV [6]) when using either ADE20k or Pascal as probe datasets.

**NetDissect.** Table 1 contains the label generated for all neurons that are strongly activated when using either ADE20k [14, 15] or Pascal [2] as the probe dataset. A majority of neurons (69/123) correspond to very different concepts.

| Neuron | ADE20k label   | ADE20k score | Pascal label | Pascal score | Neuron | ADE20k label | ADE20k score | Pascal label | Pascal score |
|--------|----------------|--------------|--------------|--------------|--------|--------------|--------------|--------------|--------------|
| 1      | counter        | 0.059        | bottle       | 0.049        | 3      | sea          | 0.067        | water        | 0.065        |
| 4      | seat           | 0.064        | tvmonitor    | 0.074        | 8      | vineyard     | 0.048        | plant        | 0.043        |
| 9      | plant          | 0.082        | pottedplant  | 0.194        | 22     | bookcase     | 0.07         | bus          | 0.048        |
| 30     | house          | 0.094        | building     | 0.043        | 37     | boat         | 0.043        | boat         | 0.213        |
| 43     | bed            | 0.151        | bed          | 0.075        | 47     | pool table   | 0.135        | airplane     | 0.079        |
| 60     | plane          | 0.052        | airplane     | 0.168        | 63     | field        | 0.053        | muzzle       | 0.042        |
| 69     | person         | 0.047        | hair         | 0.086        | 73     | water        | 0.041        | bird         | 0.080        |
| 79     | plant          | 0.064        | pottedplant  | 0.064        | 90     | mountain     | 0.071        | mountain     | 0.066        |
| 102    | bathtub        | 0.040        | cat          | 0.055        | 104    | cradle       | 0.081        | bus          | 0.112        |
| 105    | sea            | 0.106        | water        | 0.058        | 106    | rock         | 0.048        | rock         | 0.06         |
| 110    | painting       | 0.119        | painting     | 0.06         | 112    | field        | 0.05         | bus          | 0.051        |
| 113    | table          | 0.116        | table        | 0.066        | 115    | plane        | 0.046        | airplane     | 0.147        |
| 120    | sidewalk       | 0.042        | track        | 0.075        | 125    | table        | 0.049        | wineglass    | 0.047        |
| 126    | stove          | 0.064        | bottle       | 0.163        | 127    | book         | 0.104        | book         | 0.096        |
| 131    | signboard      | 0.043        | body         | 0.069        | 134    | bathtub      | 0.088        | boat         | 0.059        |
| 141    | skyscraper     | 0.065        | cage         | 0.068        | 155    | mountain     | 0.091        | train        | 0.058        |
| 158    | book           | 0.042        | book         | 0.052        | 165    | sea          | 0.051        | water        | 0.051        |
| 168    | railroad train | 0.055        | train        | 0.193        | 172    | car          | 0.055        | bus          | 0.101        |
| 173    | car            | 0.052        | bus          | 0.099        | 181    | plant        | 0.068        | pottedplant  | 0.14         |
| 183    | person         | 0.041        | horse        | 0.187        | 184    | cradle       | 0.046        | cat          | 0.042        |
| 185    | chair          | 0.077        | horse        | 0.153        | 186    | person       | 0.051        | bird         | 0.094        |
| 191    | swimming pool  | 0.044        | pottedplant  | 0.072        | 198    | pool table   | 0.064        | ceiling      | 0.066        |
| 208    | shelf          | 0.047        | bus          | 0.062        | 211    | computer     | 0.076        | tvmonitor    | 0.089        |
| 217    | toilet         | 0.049        | hair         | 0.055        | 218    | case         | 0.044        | track        | 0.165        |
| 219    | plane          | 0.065        | airplane     | 0.189        | 220    | road         | 0.066        | road         | 0.066        |
| 222    | grass          | 0.105        | grass        | 0.046        | 223    | house        | 0.069        | airplane     | 0.055        |
| 231    | grandstand     | 0.097        | screen       | 0.047        | 234    | bridge       | 0.05         | train        | 0.042        |
| 239    | pool table     | 0.069        | horse        | 0.171        | 245    | water        | 0.063        | water        | 0.042        |
| 247    | plane          | 0.079        | airplane     | 0.177        | 248    | bed          | 0.127        | tvmonitor    | 0.063        |
| 251    | sofa           | 0.073        | pottedplant  | 0.053        | 257    | tent         | 0.042        | bus          | 0.279        |
| 260    | flower         | 0.082        | food         | 0.069        | 267    | apparel      | 0.042        | car          | 0.045        |
| 276    | earth          | 0.041        | rock         | 0.047        | 278    | field        | 0.06         | sheep        | 0.044        |
| 280    | mountain       | 0.045        | mountain     | 0.056        | 287    | plant        | 0.078        | pottedplant  | 0.07         |
| 289    | pool table     | 0.049        | food         | 0.059        | 290    | mountain     | 0.085        | mountain     | 0.097        |
| 293    | shelf          | 0.074        | bottle       | 0.105        | 298    | path         | 0.047        | motorbike    | 0.068        |
| 305    | waterfall      | 0.057        | mountain     | 0.047        | 309    | washer       | 0.109        | bus          | 0.065        |
| 318    | computer       | 0.079        | tvmonitor    | 0.251        | 322    | ball         | 0.054        | sheep        | 0.044        |
| 324    | mountain       | 0.071        | motorbike    | 0.048        | 325    | person       | 0.04         | head         | 0.059        |
| 327    | waterfall      | 0.055        | bird         | 0.087        | 337    | water        | 0.072        | boat         | 0.109        |
| 341    | sea            | 0.153        | boat         | 0.076        | 344    | person       | 0.052        | person       | 0.048        |
| 345    | autobus        | 0.042        | bus          | 0.142        | 347    | palm         | 0.051        | bicycle      | 0.083        |
| 348    | mountain       | 0.058        | mountain     | 0.125        | 354    | cradle       | 0.042        | chair        | 0.053        |
| 357    | rock           | 0.058        | sheep        | 0.061        | 360    | pool table   | 0.048        | bird         | 0.041        |
| 364    | field          | 0.058        | plant        | 0.041        | 372    | work surface | 0.045        | cabinet      | 0.049        |
| 379    | bridge         | 0.092        | bus          | 0.046        | 383    | bed          | 0.069        | curtain      | 0.079        |
| 384    | washer         | 0.043        | bicycle      | 0.201        | 386    | autobus      | 0.067        | bus          | 0.200        |
| 387    | hovel          | 0.04         | train        | 0.085        | 389    | chair        | 0.066        | chair        | 0.051        |
| 398    | windowpane     | 0.073        | windowpane   | 0.07         | 400    | plant        | 0.043        | pottedplant  | 0.097        |
| 408    | toilet         | 0.045        | bottle       | 0.099        | 412    | bed          | 0.079        | airplane     | 0.086        |
| 413    | pool table     | 0.09         | motorbike    | 0.07         | 415    | seat         | 0.044        | tvmonitor    | 0.045        |
| 417    | sand           | 0.06         | sand         | 0.049        | 419    | bed          | 0.061        | tvmonitor    | 0.054        |
| 422    | seat           | 0.089        | tvmonitor    | 0.056        | 430    | bed          | 0.078        | bedclothes   | 0.042        |
| 434    | case           | 0.047        | cup          | 0.041        | 435    | runway       | 0.072        | airplane     | 0.189        |
| 438    | plane          | 0.045        | airplane     | 0.235        | 444    | sofa         | 0.045        | plant        | 0.09         |
| 445    | car            | 0.201        | car          | 0.093        | 446    | pool table   | 0.193        | tvmonitor    | 0.086        |
| 454    | car            | 0.218        | car          | 0.156        | 463    | snow         | 0.059        | snow         | 0.118        |
| 465    | crosswalk      | 0.097        | road         | 0.047        | 475    | cradle       | 0.061        | train        | 0.132        |
| 477    | desk           | 0.104        | tvmonitor    | 0.085        | 480    | sofa         | 0.086        | sofa         | 0.081        |
| 483    | swivel chair   | 0.052        | horse        | 0.041        | 484    | water        | 0.15         | water        | 0.102        |
| 485    | sofa           | 0.056        | airplane     | 0.045        | 500    | sofa         | 0.156        | sofa         | 0.11         |
| 502    | washer         | 0.07         | train        | 0.134        | 503    | bookcase     | 0.109        | book         | 0.075        |
| 509    | computer       | 0.044        | tvmonitor    | 0.074        |        |              |              |              |              |

Table 1. We show labels for all neurons from the penultimate layer of a ResNet18 model that are marked as highly activated by both datasets by NetDissect [1]. We find that a 69/123 of neurons correspond to labels that are radically different (shown in red). The remainder correspond to either the same or very similar concepts.

As mentioned by Fong *et al.* [3] and Olah *et al.* [9], neurons in deep neural networks can be *poly-semantic*, i.e., some neurons can recognize multiple concepts. We check if

the results from above are due to such neurons, and confirm that that is not the case: out of the 69 neurons, only 7 are highly activated ( $\text{IOU}_c > 0.04$ ) by both concepts. Table 2 con-

tains the IOU scores for both the ADE20k and Pascal label for each neuron outputting very different concepts.

**TCAV.** We report the cosine similarities between the concept activation vectors learned using ADE20k and Pascal as probe datasets for all 32 concepts that have a base rate of at least 1% in Table 3. On the whole, we see that the vectors are not very similar, despite the vectors predicting the concepts well.

## B.2. Difference in probe dataset distribution

The first method we use to look at the difference in the 2 probe datasets we used was to consider the base rates of different concepts within the dataset. As noted in Section 3 of the main paper, there are some sizable differences. Figure 1 contains the base rates for all concepts highlighted in Table 2 of the main paper. Some concepts that have very different base rates are `wall` (highlighted for `bow-window` when using ADE20k, but not Pascal), `floor` (highlighted for `auto-showroom` when using ADE20k but not Pascal), `dog` (highlighted for `corn-field` when using Pascal, but not ADE20k) and `pole` (highlighted for `hardware-store` for Pascal, but not ADE20k).

However, more than just the base rate, the images themselves look very different across scenes. We visualize random images from different scenes in Figure 2, and find, for example, images labelled `bedroom` in Pascal tend to have either a person or animal sleeping on a bed, without much of the remaining bedroom being shown, whereas ADE20k features images of full bedrooms. Similarly, images labelled `tree-farm` contain people in Pascal, but do not in ADE20k.

### Upper bounds.

Finally, we present a simple method to compare the similarity of the probe dataset with that of the training dataset by noting that the probe dataset establishes a strict *upper bound* on the fraction of the model that can be explained. This is intuitively true since the set of semantic labeled concepts is finite, but actually goes deeper than that. Consider the following experiment: we take the original black-box model, run it on a probe dataset to make predictions, and then train a new classifier to emulate those predictions. If this classifier is restricted to use only the labeled concepts then this is similar to a concept-based explanation. However, even if it’s trained on the rich underlying visual features it would not perform perfectly due to the differences between the original training dataset and the probe dataset.

Concretely, consider a black-box ResNet18-based [4] model trained on the Places365 [13] dataset. We reset and re-train its final linear classification layer on the Pascal [2] probe dataset to emulate the original scene predictions; this achieves only 63.7% accuracy. Similarly, on the ADE20k [14, 15] as the probe dataset it achieves only

slightly better 75.7% accuracy, suggesting that this dataset is somewhat more similar to Places365 than Pascal but still far from fully capturing the distribution. This is not to suggest that the only way to generate concept-based explanations is to collect concept labels for the original training set (which may lead to overfitting); rather, it’s important to acknowledge this limitation and quantify the explanation method based on such upper bounds.

Similarly, we can ask how well the Concept Bottleneck model [8] can be explained using the CUB test dataset. However, in this case, since the training and test distributions are (hopefully!) similar, we would expect our upper bound to be reasonably high. We check this with our same set up, and find that this is indeed the case – resetting and re-training the final linear layer, using the model’s predictions as our targets achieves an accuracy of 89.3%.

## C. Concepts used: more details

Here, we provide additional results regarding learning CUB concepts from Section 4.2 of the main paper. The CUB dataset was used by Concept Bottleneck [8], an interpretable-by-design model. This method learned the concepts as an intermediate layer within the network, and then used these concepts to predict the target class. Figure 3 contains the histograms of the normalized AP scores for the 112 concepts from CUB [12] as well as the APs for the target bird classes learned by the model. Similar to learning classifiers for the Broden [1] concepts, we learn a linear model using features from an Imagenet [11] trained Resnet18 [4] model. On average, we see that the bird classes are much better learned than the concepts.

## D. Human study details

In Section 5 of the main paper, we discuss the human studies we ran to understand how well humans are able to reason about concept-based explanations as the number of concepts used within the explanation increases. In this section, we provide additional details.

To recap, we compare four types of explanations: (1) concept-based explanations that use 8 concepts, (2) concept-based explanations that use 16 concepts, (3) concept-based explanations that use 32 concepts, and (4) example-based explanations that consist of 10 example images for which the model predicts a certain class. (4) is a baseline that doesn’t use concepts.

For a fair comparison, all four types of explanations are evaluated on the same inputs. We generate five sets of input where each set consists of 5 images from one scene group (commercial buildings, shops, markets, cities, and towns) and 5 images from another scene group (home or hotel). Recall that these are images where the model output match the explanation output (i.e., the class with the highest ex-

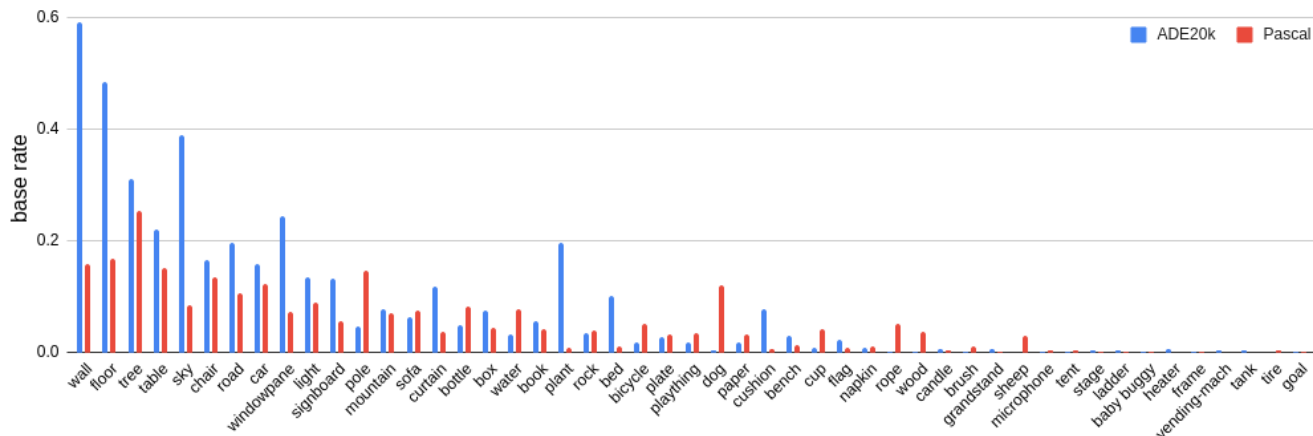

Figure 1. Different concepts have very different base rates across Pascal and ADE20k. The graph shows the base rates for the different concepts highlighted within Table 2 in the main paper.

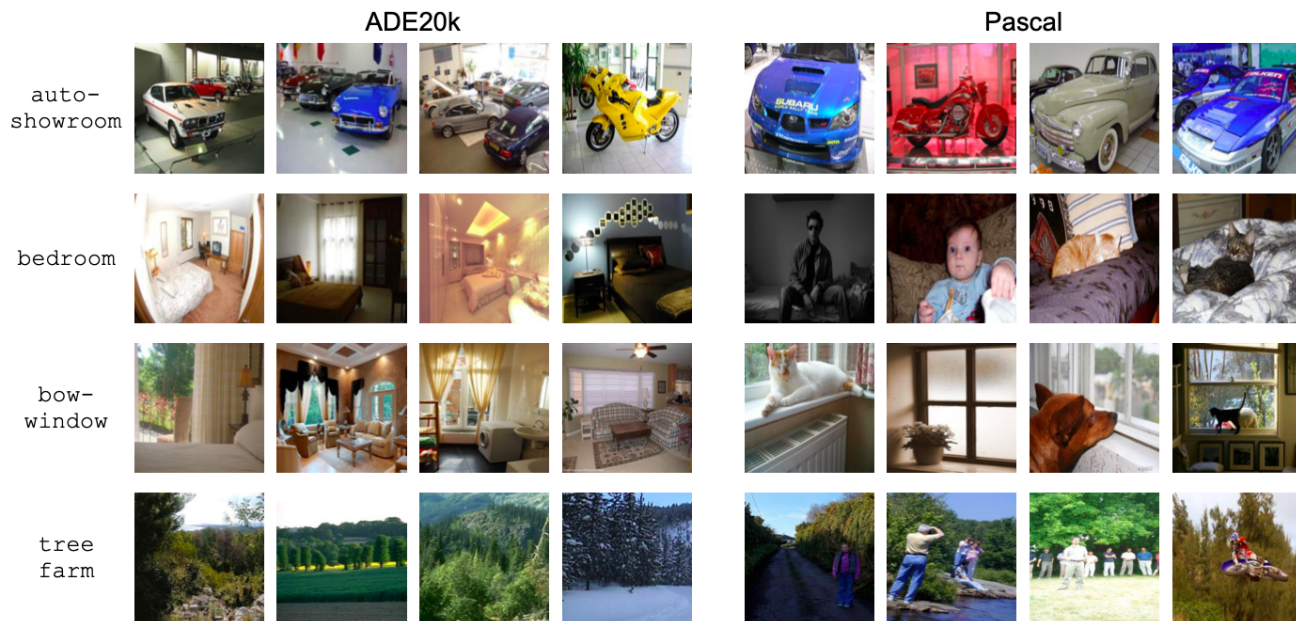

Figure 2. We view a few example images from ADE20k and Pascal for 4 scene classes that had very different explanations in Table 2 from the original paper. We see that these classes have very different distributions; for example, the images labelled as bedroom from the Pascal dataset tend to have an animal or person on a bed, whereas the ones from ADE20k do not.

planation score calculated based on ground-truth concept labels). Hence, if the participants correctly identify all concepts that appear in a given image, they are guaranteed to get the highest explanation score for the model output class.

To reduce the variance with respect to the input, we had 5 participants for each set of input and explanation type. For 32 concepts explanations, each participant saw 5 images from only one of the two scene groups because the study got too long and overwhelming with the full set of 10 images. For all other explanations, each participant saw the full set of 10 images. In total, we had 125 participants: 50 participants for the study with 32 concepts explanations and 25 participants for the other three studies. Each participant

sees only one type of explanation as we conduct a between-group study.

More specifically, we recruited participants through Amazon Mechanical Turk who are US-based, have done over 1000 Human Intelligence Tasks, and have prior approval rate of at least 98%. The demographic distribution was: man 59%, woman 41%; no race/ethnicity reported 82%, White 17%, Black/African American 1%, Asian 1%. The self-reported machine learning experience was  $2.5 \pm 1.0$ , between “2: have heard about...” and “3: know the basics...” We did not collect any personally identifiable information. Participants were compensated based on the state-level minimum wage of \$12/hr. In total, ~\$800 was spent



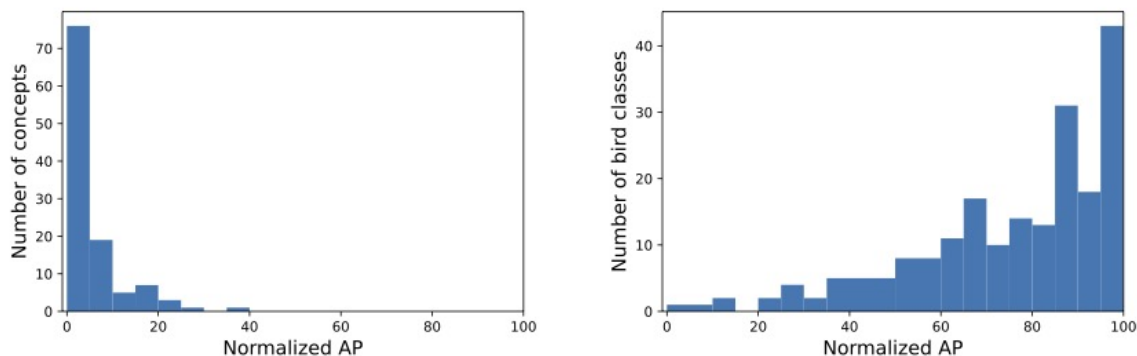

Figure 3. We compare the normalized APs when trying to learn CUB concepts (*left*) to the normalized APs of the CUB target classes for the Concept Bottleneck model (*right*). On average, the concepts are much harder to learn.

on running human studies.

## E. User interface snapshots

In Section 5.1 of the main paper, we outlined our human study design.<sup>1</sup> Here we provide snapshots of our study UIs in the following order.

**Study introduction..** For each participant, we introduce the study, present a consent form, and receive informed consent for participation in the study. The consent form was approved by our institution’s Institutional Review Board and acknowledges that participation is voluntary, refusal to participate will involve no penalty or loss of benefits, etc. See Fig. 4.

**Demographics and background..** Following HIVE [7], we request optional demographic data regarding gender identity, race and ethnicity, as well as the participant’s experience with machine learning. We collect this information to help future researchers calibrate our results. See Fig. 5.

**Method introduction..** We introduce concept-based explanations in simple terms. This page is not shown for the study with example-based explanations. See Fig. 6.

**Task preview .** We present a practice example to help participants get familiar with the task. This page is not shown for the study with example-based explanations. See Fig. 7.

**Part 1: Recognize concepts and guess the model output.** After the preview, participants move onto the main task where they are asked to recognize concepts in a given photo (for concept-based explanations) and predict the model output (for all explanations). We show the UI for each type of explanation we study:

- 8 concept explanations (Fig. 8)
- 16 concepts explanations (Fig. 9)

<sup>1</sup>We note that much of our study design and UI is based on the recent work by Kim et al. [?] who propose a human evaluation framework called HIVE for evaluating visual interpretability methods.

- 32 concepts explanations (Fig. 10)
- Example-based explanations (Fig. 11)

**Part 2: Choose the ideal tradeoff between simplicity and correctness..** Concept-based explanations can have varying levels of complexity/simplicity and correctness. Hence, we investigate how participants reason with these two properties. To do so, we show examples of concept-based explanations that use different numbers of concepts, as well as bar plots with the correctness values for certain instantiations of concept-based explanations. We then ask participants to choose the explanation they prefer the most and provide a short written justification for their choice. See Fig. 12.

**Feedback..** At the end of the study, participants can optionally provide feedback. See Fig. 13.

## CVPR 2023 Submission #1118. CONFIDENTIAL REVIEW COPY. DO NOT DISTRIBUTE.

|     | neuron | ADE20k label  | Pascal label | Probe dataset: ADE20k |                  | Probe dataset: Pascal |                  |     |
|-----|--------|---------------|--------------|-----------------------|------------------|-----------------------|------------------|-----|
|     |        |               |              | IOU ADE20k label      | IOU Pascal label | IOU ADE20k label      | IOU Pascal label |     |
| 540 |        |               |              |                       |                  |                       |                  | 594 |
| 541 |        |               |              |                       |                  |                       |                  | 595 |
| 542 | 1      | counter       | bottle       | 0.059                 | 0.006            | 0.006                 | 0.049            | 596 |
| 543 | 4      | seat          | tvmonitor    | 0.064                 | 0.0              | 0.0                   | 0.074            | 597 |
| 544 | 22     | bookcase      | bus          | 0.07                  | 0.0              | 0.0                   | 0.048            | 598 |
| 545 | 47     | pool table    | airplane     | 0.135                 | 0.0              | 0.002                 | 0.079            | 599 |
| 546 | 63     | field         | muzzle       | 0.053                 | 0.0              | 0.0                   | 0.042            | 600 |
| 547 | 73     | water         | bird         | 0.041                 | 0.002            | 0.052                 | 0.08             | 601 |
| 548 | 102    | bathtub       | cat          | 0.04                  | 0.0              | 0.0                   | 0.055            | 602 |
| 549 | 104    | cradle        | bus          | 0.081                 | 0.0              | 0.0                   | 0.112            | 603 |
| 550 | 112    | field         | bus          | 0.05                  | 0.0              | 0.0                   | 0.051            | 604 |
| 551 | 120    | sidewalk      | track        | 0.042                 | 0.001            | 0.023                 | 0.075            | 605 |
| 552 | 125    | table         | wineglass    | 0.049                 | 0.0              | 0.043                 | 0.047            | 606 |
| 553 | 126    | stove         | bottle       | 0.064                 | 0.029            | 0.005                 | 0.163            | 607 |
| 554 | 131    | signboard     | body         | 0.043                 | 0.0              | 0.06                  | 0.069            | 608 |
| 555 | 134    | bathtub       | boat         | 0.088                 | 0.001            | 0.005                 | 0.059            | 609 |
| 556 | 141    | skyscraper    | cage         | 0.065                 | 0.001            | 0.0                   | 0.068            | 610 |
| 557 | 155    | mountain      | train        | 0.091                 | 0.0              | 0.038                 | 0.058            | 611 |
| 558 | 172    | car           | bus          | 0.055                 | 0.0              | 0.015                 | 0.101            | 612 |
| 559 | 173    | car           | bus          | 0.052                 | 0.0              | 0.013                 | 0.099            | 613 |
| 560 | 183    | person        | horse        | 0.041                 | 0.016            | 0.003                 | 0.187            | 614 |
| 561 | 184    | cradle        | cat          | 0.046                 | 0.0              | 0.0                   | 0.042            | 615 |
| 562 | 185    | chair         | horse        | 0.077                 | 0.014            | 0.011                 | 0.153            | 616 |
| 563 | 186    | person        | bird         | 0.051                 | 0.001            | 0.017                 | 0.094            | 617 |
| 564 | 191    | swimming pool | pottedplant  | 0.044                 | 0.0              | 0.0                   | 0.072            | 618 |
| 565 | 198    | pool table    | ceiling      | 0.064                 | 0.035            | 0.001                 | 0.066            | 619 |
| 566 | 208    | shelf         | bus          | 0.047                 | 0.0              | 0.0                   | 0.062            | 620 |
| 567 | 217    | toilet        | hair         | 0.049                 | 0.001            | 0.0                   | 0.055            | 621 |
| 568 | 218    | case          | track        | 0.044                 | 0.001            | 0.0                   | 0.165            | 622 |
| 569 | 223    | house         | airplane     | 0.069                 | 0.0              | 0.0                   | 0.055            | 623 |
| 570 | 231    | grandstand    | screen       | 0.097                 | 0.0              | 0.007                 | 0.047            | 624 |
| 571 | 234    | bridge        | train        | 0.05                  | 0.0              | 0.014                 | 0.042            | 625 |
| 572 | 239    | pool table    | horse        | 0.069                 | 0.011            | 0.0                   | 0.171            | 626 |
| 573 | 248    | bed           | tvmonitor    | 0.127                 | 0.0              | 0.027                 | 0.063            | 627 |
| 574 | 251    | sofa          | pottedplant  | 0.073                 | 0.0              | 0.033                 | 0.053            | 628 |
| 575 | 257    | tent          | bus          | 0.042                 | 0.0              | 0.005                 | 0.279            | 629 |
| 576 | 260    | flower        | food         | 0.082                 | 0.033            | 0.064                 | 0.069            | 630 |
| 577 | 267    | apparel       | car          | 0.042                 | 0.023            | 0.0                   | 0.045            | 631 |
| 578 | 278    | field         | sheep        | 0.06                  | 0.0              | 0.0                   | 0.044            | 632 |
| 579 | 289    | pool table    | food         | 0.049                 | 0.024            | 0.0                   | 0.059            | 633 |
| 580 | 293    | shelf         | bottle       | 0.074                 | 0.025            | 0.0                   | 0.105            | 634 |
| 581 | 298    | path          | motorbike    | 0.047                 | 0.0              | 0.0                   | 0.068            | 635 |
| 582 | 305    | waterfall     | mountain     | 0.057                 | 0.049            | 0.0                   | 0.047            | 636 |
| 583 | 309    | washer        | bus          | 0.109                 | 0.0              | 0.013                 | 0.065            | 637 |
| 584 | 322    | ball          | sheep        | 0.054                 | 0.0              | 0.005                 | 0.044            | 638 |
| 585 | 324    | mountain      | motorbike    | 0.071                 | 0.0              | 0.015                 | 0.048            | 639 |
| 586 | 327    | waterfall     | bird         | 0.055                 | 0.001            | 0.0                   | 0.087            | 640 |
| 587 | 337    | water         | boat         | 0.072                 | 0.031            | 0.053                 | 0.109            | 641 |
| 588 | 341    | sea           | boat         | 0.153                 | 0.014            | 0.0                   | 0.076            | 642 |
| 589 | 347    | palm          | bicycle      | 0.051                 | 0.001            | 0.0                   | 0.083            | 643 |
| 590 | 354    | cradle        | chair        | 0.042                 | 0.03             | 0.0                   | 0.053            | 644 |
| 591 | 357    | rock          | sheep        | 0.058                 | 0.0              | 0.006                 | 0.061            | 645 |
| 592 | 360    | pool table    | bird         | 0.048                 | 0.0              | 0.0                   | 0.041            | 646 |
| 593 | 379    | bridge        | bus          | 0.092                 | 0.0              | 0.03                  | 0.046            | 647 |
|     | 383    | bed           | curtain      | 0.069                 | 0.064            | 0.01                  | 0.079            |     |
|     | 384    | washer        | bicycle      | 0.043                 | 0.018            | 0.0                   | 0.201            |     |
|     | 387    | hovel         | train        | 0.04                  | 0.0              | 0.0                   | 0.085            |     |
|     | 408    | toilet        | bottle       | 0.045                 | 0.002            | 0.0                   | 0.099            |     |
|     | 412    | bed           | airplane     | 0.079                 | 0.0              | 0.008                 | 0.086            |     |
|     | 413    | pool table    | motorbike    | 0.09                  | 0.0              | 0.003                 | 0.07             |     |
|     | 415    | seat          | tvmonitor    | 0.044                 | 0.0              | 0.0                   | 0.045            |     |
|     | 419    | bed           | tvmonitor    | 0.061                 | 0.0              | 0.016                 | 0.054            |     |
|     | 422    | seat          | tvmonitor    | 0.089                 | 0.0              | 0.0                   | 0.056            |     |
|     | 434    | case          | cup          | 0.047                 | 0.001            | 0.0                   | 0.041            |     |
|     | 444    | sofa          | plant        | 0.045                 | 0.009            | 0.014                 | 0.09             |     |
|     | 446    | pool table    | tvmonitor    | 0.193                 | 0.0              | 0.006                 | 0.086            |     |
|     | 475    | cradle        | train        | 0.061                 | 0.0              | 0.0                   | 0.132            |     |
|     | 477    | desk          | tvmonitor    | 0.104                 | 0.0              | 0.0                   | 0.085            |     |
|     | 483    | swivel chair  | horse        | 0.052                 | 0.006            | 0.0                   | 0.041            |     |
|     | 485    | sofa          | airplane     | 0.056                 | 0.0              | 0.024                 | 0.045            |     |
|     | 502    | washer        | train        | 0.07                  | 0.0              | 0.006                 | 0.134            |     |

Table 2. For all neurons from Tab. 1 that output radically different concepts when explanations are computed using ADE20k vs Pascal, we compute the IOU scores for the other concept as well. Other than the 7 attributes marked in *red*, the IOU scores are all below 0.04, suggesting that this is not because the neurons are polysemantic.

648  
649  
650  
651  
652  
653  
654  
655  
656  
657  
658  
659  
660  
661  
662  
663  
664  
665  
666  
667  
668  
669  
670  
671  
672  
673  
674  
675  
676  
677  
678  
679  
680  
681  
682  
683  
684  
685  
686  
687  
688  
689  
690  
691  
692  
693  
694  
695  
696  
697  
698  
699  
700  
701702  
703  
704  
705  
706  
707  
708  
709  
710  
711  
712  
713  
714  
715  
716  
717  
718  
719  
720  
721  
722  
723  
724  
725  
726  
727  
728  
729  
730  
731  
732  
733  
734  
735  
736  
737  
738  
739  
740  
741  
742  
743  
744  
745  
746  
747  
748  
749  
750  
751  
752  
753  
754  
755

| Concept   | ADE20k AUC | Pascal AUC | Cos.sim. | Concept    | ADE20k AUC | Pascal AUC | Cos.sim. |
|-----------|------------|------------|----------|------------|------------|------------|----------|
| bag       | 79.4       | 75.4       | 0.006    | book       | 90.4       | 84.6       | 0.138    |
| bottle    | 88.5       | 85.6       | 0.035    | box        | 83.0       | 80.1       | 0.086    |
| building  | 97.4       | 90.0       | 0.161    | cabinet    | 91.3       | 92.4       | 0.03     |
| car       | 96.9       | 90.3       | 0.147    | ceiling    | 96.6       | 93.0       | 0.267    |
| chair     | 90.5       | 89.6       | 0.034    | curtain    | 91.6       | 89.5       | 0.112    |
| door      | 81.5       | 87.8       | 0.134    | fence      | 86.1       | 84.7       | 0.09     |
| floor     | 97.4       | 92.1       | 0.208    | grass      | 95.1       | 91.7       | 0.04     |
| light     | 92.4       | 85.0       | 0.043    | mountain   | 94.2       | 90.8       | 0.02     |
| painting  | 94.8       | 91.4       | 0.116    | person     | 92.2       | 92.1       | 0.253    |
| plate     | 90.6       | 94.8       | -0.009   | pole       | 89.0       | 79.3       | 0.059    |
| pot       | 79.3       | 85.2       | 0.142    | road       | 98.0       | 91.8       | 0.041    |
| rock      | 92.6       | 82.8       | -0.024   | sidewalk   | 97.0       | 92.5       | 0.071    |
| signboard | 90.6       | 76.5       | 0.091    | sky        | 98.9       | 79.8       | 0.104    |
| sofa      | 95.9       | 91.2       | -0.009   | table      | 93.4       | 93.5       | 0.06     |
| tree      | 96.8       | 89.2       | 0.172    | wall       | 95.9       | 91.3       | 0.027    |
| water     | 95.2       | 94.6       | 0.078    | windowpane | 91.5       | 90.1       | 0.078    |

Table 3. We report the cosine similarities between the concept activation vectors learned using ADE20k and Pascal datasets. In general, the vectors learned from different datasets do not correlate well.

## References

- [1] David Bau, Bolei Zhou, Aditya Khosla, Aude Oliva, and Antonio Torralba. Network dissection: Quantifying interpretability of deep visual representations. In *CVPR*, 2017. 1, 2, 3
- [2] M. Everingham, L. Van Gool, C. K. I. Williams, J. Winn, and A. Zisserman. The Pascal Visual Object Classes (VOC) Challenge. *IJCV*, 2010. 1, 3
- [3] Ruth Fong and Andrea Vedaldi. Net2Vec: Quantifying and explaining how concepts are encoded by filters in deep neural networks. In *CVPR*, 2018. 2
- [4] Kaiming He, Xiangyu Zhang, Shaoqing Ren, and Jian Sun. Deep residual learning for image recognition. In *CVPR*, 2016. 1, 3
- [5] Derek Hoiem, Yodsawalai Chodpathumwan, and Qieyun Dai. Diagnosing error in object detectors. In *ECCV*, 2012. 1
- [6] Been Kim, Martin Wattenberg, Justin Gilmer, Carrie Cai, James Wexler, Fernanda Viegas, et al. Interpretability beyond feature attribution: Quantitative testing with concept activation vectors (TCAV). In *ICML*, 2018. 1
- [7] Sunnie S. Y. Kim, Nicole Meister, Vikram V. Ramaswamy, Ruth Fong, and Olga Russakovsky. HIVE: Evaluating the human interpretability of visual explanations. In *ECCV*, 2022. 5
- [8] Pang Wei Koh, Thao Nguyen, Yew Siang Tang, Stephen Mussmann, Emma Pierson, Been Kim, and Percy Liang. Concept bottleneck models. In *ICML*, 2020. 3
- [9] Chris Olah, Nick Cammarata, Ludwig Schubert, Gabriel Goh, Michael Petrov, and Shan Carter. Zoom in: An introduction to circuits. *Distill*, 2020. 2
- [10] F. Pedregosa, G. Varoquaux, A. Gramfort, V. Michel, B. Thirion, O. Grisel, M. Blondel, P. Prettenhofer, R. Weiss, V. Dubourg, J. Vanderplas, A. Passos, D. Cournapeau, M. Brucher, M. Perrot, and E. Duchesnay. Scikit-learn: Machine learning in Python. *JMLR*, 2011. 1
- [11] Olga Russakovsky, Jia Deng, Hao Su, Jonathan Krause, Sanjeev Satheesh, Sean Ma, Zhiheng Huang, Andrej Karpathy, Aditya Khosla, Michael Bernstein, Alexander C. Berg, and Li Fei-Fei. ImageNet Large Scale Visual Recognition Challenge. In *IJCV*, 2015. 1, 3
- [12] C. Wah, S. Branson, P. Welinder, P. Perona, and S. Belongie. The Caltech-UCSD Birds-200-2011 Dataset. Technical Report CNS-TR-2011-001, California Institute of Technology, 2011. 3
- [13] Bolei Zhou, Agata Lapedriza, Aditya Khosla, Aude Oliva, and Antonio Torralba. Places: A 10 million image database for scene recognition. *TPAMI*, 2017. 1, 3
- [14] Bolei Zhou, Hang Zhao, Xavier Puig, Sanja Fidler, Adela Barriuso, and Antonio Torralba. Scene parsing through ADE20k dataset. In *CVPR*, 2017. 1, 3
- [15] Bolei Zhou, Hang Zhao, Xavier Puig, Tete Xiao, Sanja Fidler, Adela Barriuso, and Antonio Torralba. Semantic understanding of scenes through the ADE20k dataset. *IJCV*, 2019. 1, 3



## Study introduction

In this study, we aim to evaluate concept-based explanations for an image classification model. We will provide explanations of how the model makes its prediction and ask you to answer several questions.

The expected duration of the study is 10-20 minutes. However, if the actual duration is longer than what we anticipated, we'll compensate your time and effort with a bonus.

## Consent

Please read the consent form. If you understand and consent to these terms, click "I Accept" to continue.

I Accept

Figure 4. UI - Study introduction

## Demographics and background

### Q. Demographics (Optional)

#### Gender identity

- Man
- Non-binary
- Woman
- Prefer to self-describe below

#### Race and ethnicity (select one or more)

- American Indian or Alaska Native
- Asian
- Black or African American
- Native Hawaiian or Other Pacific Islander
- White
- Hispanic or Latino or Spanish Origin of any race

### Q. How much experience do you have with machine learning (ML)?

- I don't know anything about ML
- I have heard about a few ML concepts or applications
- I know the basics of ML and can hold a short conversation about it
- I have taken a course on ML and/or have experience working with a ML system
- I often use and study ML in my life

Figure 5. UI - Demographics and background

## Concept-based explanations

We have a model that recognizes scenes in photos. The model predicts **golf course** for some photos, **park** for some other photos, **church** for some other photos, **supermarket** for some other photos, and so on.

One way of explaining the model's predictions is to use a set of concepts (e.g., things, stuff) and see which concepts are important to be present vs. absent in a photo for the model to predict a certain scene.

### Example

For example, one explanation might say the model predicts the scene **golf course** based on the following concepts:

**golf course** = + 2.61 grass - 1.94 building + 1.85 sky - 1.75 wall + 1.03 person - 0.87 road + 3.71

According to this explanation, the model is more likely to predict the scene **golf course** when grass, sky, person are present and when building, wall, road are absent in a photo. The last constant (+ 3.71) balances the explanation scores between different classes.

### Using scene-level explanations to explain individual predictions

For a given photo, we can recognize which concepts are present and add up their coefficients to get an explanation score.

For example in the below photo, grass, sky are present while building, wall, person, road are absent. So the explanation score for **golf course** is  $8.17 = 2.61 + 1.85 + 3.71$ .

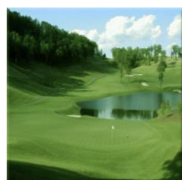

#### Concepts

- grass
- building
- sky
- wall
- person
- road

#### Explanation for golf course

$$\begin{aligned}
 &= 8.17 \\
 &= + 2.61 \times 1 \text{ (grass)} \\
 &\quad - 1.94 \times 0 \text{ (building)} \\
 &\quad + 1.85 \times 1 \text{ (sky)} \\
 &\quad - 1.75 \times 0 \text{ (wall)} \\
 &\quad + 1.03 \times 0 \text{ (person)} \\
 &\quad - 0.87 \times 0 \text{ (road)} \\
 &\quad + 3.71
 \end{aligned}$$

For the below photo, building, sky, person, road are present while grass, wall are absent. So the explanation score for **golf course** is  $3.78 = -1.94 + 1.85 + 1.03 - 0.87 + 3.71$ . For comparison, we also show the explanation for **street**. The explanation score for **street** is  $5.83 = 2.11 + 2.06 + 1.50 - 0.88 + 1.04$ . Since  $5.83$  is higher than  $3.78$ , according to these explanations it is more likely for the model to predict **street** for this photo.

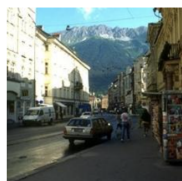

#### Concepts

- grass
- building
- sky
- wall
- person
- road

#### Explanation for golf course

$$\begin{aligned}
 &= 3.78 \\
 &= + 2.61 \times 0 \text{ (grass)} \\
 &\quad - 1.94 \times 1 \text{ (building)} \\
 &\quad + 1.85 \times 1 \text{ (sky)} \\
 &\quad - 1.75 \times 0 \text{ (wall)} \\
 &\quad + 1.03 \times 1 \text{ (person)} \\
 &\quad - 0.87 \times 1 \text{ (road)} \\
 &\quad + 3.71
 \end{aligned}$$

#### Explanation for street

$$\begin{aligned}
 &= 5.83 \\
 &= + 2.11 \times 1 \text{ (building)} \\
 &\quad + 2.06 \times 1 \text{ (person)} \\
 &\quad - 1.87 \times 0 \text{ (grass)} \\
 &\quad + 1.50 \times 1 \text{ (road)} \\
 &\quad - 0.88 \times 1 \text{ (sky)} \\
 &\quad - 0.68 \times 0 \text{ (wall)} \\
 &\quad + 1.04
 \end{aligned}$$

Figure 6. UI - Method introduction

## Task preview

You will complete the following task for 10 photos in total.

Please try your best on the task. Your work is crucial to the success of our study!

### Task: Recognize concepts and guess the model output

We have a model that predicts one of four scenes (1, 2, 3, 4) for a photo.

We also have explanations for how the model decides to predict each scene.

In this task, we ask you to use these explanations to guess which scene the model predicts.

You will do so by first **checking all concepts you think are present in the photo**, then **choosing the scene you think the model predicts** based on the explanation scores.

Note that the explanation scores changes based on your concept selections, not the model's.

We don't know what the model will predict for this photo, we're trying to guess that!

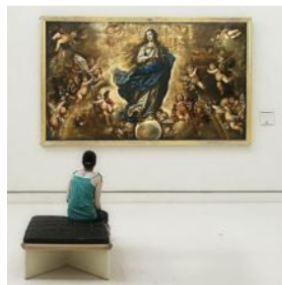

#### Concepts

- wall
- sky
- floor
- windowpane
- tree
- building
- person
- door
- table
- plant
- ceiling

#### Explanation for Scene 1

= **4.81**

- + 3.54 x 1 (wall)
- 1.96 x 0 (sky)
- + 1.63 x 0 (floor)
- 1.54 x 0 (windowpane)
- + 1.46 x 0 (tree)
- 1.31 x 0 (building)
- + 1.25 x 1 (person)
- 1.22 x 0 (door)
- + 0.02

#### Explanation for Scene 2

= **2.85**

- + 2.43 x 1 (wall)
- 1.94 x 0 (sky)
- + 0.42

#### Explanation for Scene 3

= **6.46**

- + 3.07 x 1 (wall)
- 2.31 x 0 (sky)
- 2.24 x 0 (floor)
- + 1.81 x 0 (windowpane)
- 1.79 x 0 (tree)
- 1.69 x 0 (building)
- + 1.37 x 1 (person)
- 1.36 x 0 (ceiling)
- + 2.02

#### Explanation for Scene 4

= **-0.43**

- 1.81 x 1 (wall)
- 1.66 x 0 (floor)
- + 1.38 x 1 (person)
- 1.37 x 0 (door)
- + 1.00 x 0 (ceiling)
- + 0.00

#### Q. Which scene do you think the model predicts?

Scene 1  Scene 2  Scene 3  Scene 4

Click "Record" after selecting your answer.

Record

The concepts present in the photo are wall, floor, person. Please try to be as accurate as possible when the actual task begins!

Figure 7. UI - Task preview

## Task: Recognize concepts and guess the model output

We have a model that predicts one of four scenes (A, B, C, D) for a photo.  
We also have explanations for how the model decides to predict each scene.

In this task, we ask you to use these explanations to guess which scene the model predicts.  
You will do so by first **checking all concepts you think are present in the photo**,  
then **choosing the scene you think the model predicts** based on the explanation scores.

Note that the explanation scores changes based on your concept selections, not the model's.  
We don't know what the model will predict for this photo, we're trying to guess that!

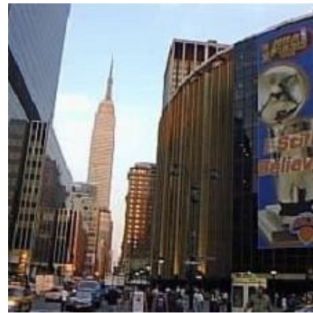

### Concepts

- sky
- person
- road
- grass
- plant
- car
- sidewalk
- skyscraper

#### Explanation for Scene A

= **0.00**  
= - 0.12 x 0 (sidewalk)  
+ 0.00

#### Explanation for Scene B

= **1.04**  
= - 1.44 x 0 (skyscraper)  
- 1.03 x 0 (sky)  
+ 0.69 x 0 (grass)  
- 0.23 x 0 (car)  
+ 0.23 x 0 (plant)  
+ 1.04

#### Explanation for Scene C

= **1.04**  
= + 1.54 x 0 (skyscraper)  
- 1.11 x 0 (car)  
- 1.04 x 0 (road)  
- 1.00 x 0 (sidewalk)  
- 0.75 x 0 (person)  
+ 1.04

#### Explanation for Scene D

= **0.61**  
= - 1.90 x 0 (skyscraper)  
+ 0.27 x 0 (car)  
- 0.19 x 0 (grass)  
+ 0.04 x 0 (sidewalk)  
+ 0.61

Q. Which scene class do you think the model predicts?

Scene A  Scene B  Scene C  Scene D

Click "Record" then "Next Photo" after selecting your answer.

Record

Are you sure you want to select 0 concepts? Please try to be as accurate as possible in the task.

3 / 5

Next Photo

Figure 8. UI - Part 1: Recognize concepts and guess the model output (8 concepts explanations)



## Task: Recognize concepts and guess the model output

We have a model that predicts one of four scenes (W, X, Y, Z) for a photo.

We also have explanations for how the model decides to predict each scene.

In this task, we ask you to use these explanations to guess which scene the model predicts.

You will do so by first **checking all concepts you think are present in the photo**, then **choosing the scene you think the model predicts** based on the explanation scores.

Note that the explanation scores changes based on your concept selections, not the model's.

We don't know what the model will predict for this photo, we're trying to guess that!

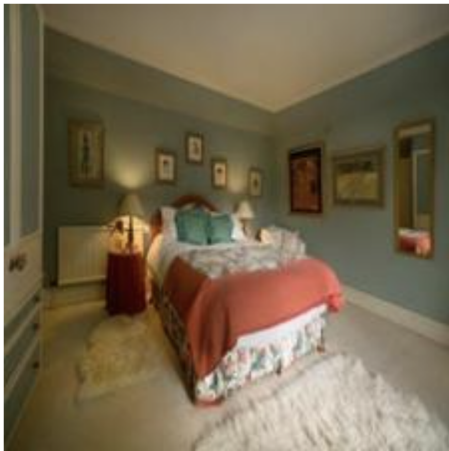

### Concepts

- wall
- floor
- windowpane
- table
- plant
- chair
- carpet
- lamp
- bed
- sofa
- cushion
- vase
- armchair
- sconce
- coffee table
- fireplace

#### Explanation for Scene W

= **1.88**  
 = + 1.88 x 1 (bed)  
 - 0.95 x 0 (chair)  
 - 0.60 x 0 (sofa)  
 - 0.28 x 0 (armchair)  
 - 0.04 x 0 (table)  
 - 0.03 x 0 (sconce)  
 + 0.00

#### Explanation for Scene X

= **-2.60**  
 = - 3.20 x 1 (bed)  
 + 1.47 x 0 (chair)  
 - 1.38 x 0 (sofa)  
 - 0.80 x 1 (cushion)  
 - 0.39 x 0 (coffee table)  
 - 0.14 x 0 (armchair)  
 - 0.14 x 0 (lamp)  
 + 1.40

#### Explanation for Scene Y

= **1.27**  
 = + 1.36 x 1 (bed)  
 - 1.02 x 0 (windowpane)  
 - 0.92 x 1 (wall)  
 - 0.31 x 0 (plant)  
 - 0.24 x 0 (carpet)  
 + 0.19 x 0 (sconce)  
 - 0.18 x 1 (floor)  
 - 0.15 x 1 (cushion)  
 - 0.11 x 0 (vase)  
 + 1.16

#### Explanation for Scene Z

= **-0.54**  
 = + 2.00 x 0 (sofa)  
 - 1.73 x 1 (bed)  
 - 0.88 x 0 (table)  
 + 0.68 x 0 (coffee table)  
 - 0.52 x 0 (chair)  
 - 0.38 x 1 (wall)  
 + 0.30 x 0 (armchair)  
 + 0.20 x 0 (fireplace)  
 + 0.17 x 1 (cushion)  
 + 1.40

Q. Which scene class do you think the model predicts?

Scene W  Scene X  Scene Y  Scene Z

Click "Record" then "Next Photo" after selecting the rows and answering the question.

Record

1 / 5

Next Photo

Figure 9. UI - Part 1: Recognize concepts and guess the model output (16 concepts explanations)

# Task: Recognize concepts and guess the model output

We have a model that predicts one of four scenes (A, B, C, D) for a photo.

We also have explanations for how the model decides to predict each scene.

In this task, we ask you to use these explanations to guess which scene the model predicts.

You will do so by first **checking all concepts you think are present in the photo**, then **choosing the scene you think the model predicts** based on the explanation scores.

Note that the explanation scores changes based on your concept selections, not the model's.

We don't know what the model will predict for this photo, we're trying to guess that!

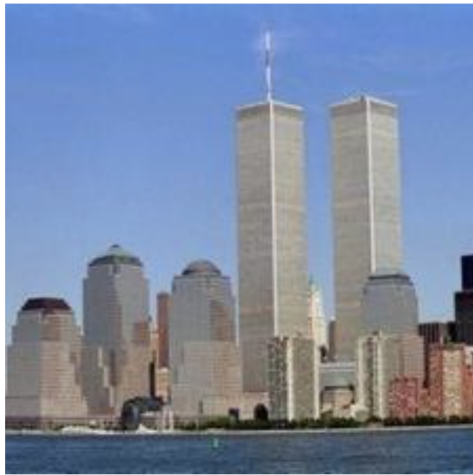

## Concepts

- wall
- sky
- floor
- tree
- person
- road
- grass
- plant
- car
- sidewalk
- mountain
- streetlight
- box
- earth
- rock
- pot

## (continued)

- flowerpot
- stairs
- bag
- ashcan
- spotlight
- stairway
- van
- truck
- awning
- traffic light
- flag
- bucket
- pedestal
- trade name
- palm
- skyscraper

### Explanation for Scene A

= 1.62

- + 1.15 x 0 (flag)
- + 1.12 x 1 (skyscraper)
- 0.99 x 0 (awning)
- + 0.86 x 0 (earth)
- + 0.83 x 0 (floor)
- + 0.80 x 0 (car)
- 0.76 x 0 (pot)
- + 0.63 x 0 (trade name)
- + 0.57 x 0 (traffic light)
- + 0.55 x 0 (wall)
- + 0.55 x 0 (streetlight)
- 0.53 x 0 (sidewalk)
- + 0.51 x 0 (stairs)
- + 0.50 x 1 (sky)
- + 0.43 x 0 (truck)
- + 0.40 x 0 (pedestal)
- 0.39 x 0 (ashcan)
- + 0.37 x 0 (grass)
- + 0.32 x 0 (road)
- + 0.32 x 0 (flowerpot)
- + 0.32 x 0 (tree)
- + 0.26 x 0 (bag)
- 0.26 x 0 (van)
- + 0.26 x 0 (palm)
- + 0.24 x 0 (bucket)
- 0.19 x 0 (person)
- 0.04 x 0 (spotlight)
- + 0.00

### Explanation for Scene B

= -2.07

- 3.74 x 1 (skyscraper)
- + 2.13 x 0 (stairway)
- + 1.73 x 0 (grass)
- 1.37 x 1 (sky)
- + 1.26 x 0 (palm)
- 0.90 x 0 (truck)
- + 0.89 x 0 (rock)
- + 0.89 x 0 (plant)
- 0.84 x 0 (box)
- 0.79 x 0 (car)
- 0.48 x 0 (flowerpot)
- + 0.44 x 0 (flag)
- + 0.40 x 0 (traffic light)
- 0.34 x 0 (streetlight)
- + 0.30 x 0 (road)
- 0.28 x 0 (van)
- 0.26 x 0 (mountain)
- + 0.20 x 0 (sidewalk)
- 0.19 x 0 (spotlight)
- 0.16 x 0 (awning)
- 0.15 x 0 (bag)
- + 0.13 x 0 (ashcan)
- 0.07 x 0 (stairs)
- 0.01 x 0 (trade name)
- + 3.04

### Explanation for Scene C

= 5.71

- 2.69 x 0 (person)
- + 2.11 x 1 (skyscraper)
- 1.71 x 0 (car)
- 1.42 x 0 (road)
- 1.41 x 0 (sidewalk)
- + 0.56 x 1 (sky)
- 0.48 x 0 (wall)
- 0.31 x 0 (tree)
- 0.30 x 0 (streetlight)
- 0.26 x 0 (flag)
- + 3.04

### Explanation for Scene D

= -1.70

- 2.73 x 1 (skyscraper)
- 1.88 x 0 (grass)
- 1.07 x 0 (flag)
- + 1.01 x 0 (road)
- 0.92 x 0 (stairway)
- 0.78 x 0 (traffic light)
- + 0.69 x 0 (sidewalk)
- + 0.68 x 0 (car)
- + 0.66 x 0 (awning)
- 0.60 x 0 (plant)
- + 0.48 x 0 (person)
- + 0.41 x 0 (van)
- + 0.40 x 1 (sky)
- 0.38 x 0 (palm)
- 0.30 x 0 (wall)
- 0.23 x 0 (earth)
- + 0.19 x 0 (spotlight)
- 0.11 x 0 (trade name)
- + 0.07 x 0 (mountain)
- + 0.63

Q. Which scene class do you think the model predicts?

- Scene A  Scene B  Scene C  Scene D

14

Click "Record" then "Next Photo" after selecting your answer.

1512  
1513  
1514  
1515  
1516  
1517  
1518  
1519  
1520  
1521  
1522  
1523  
1524  
1525  
1526  
1527  
1528  
1529  
1530  
1531  
1532  
1533  
1534  
1535  
1536  
1537  
1538  
1539  
1540  
1541  
1542  
1543  
1544  
1545  
1546  
1547  
1548  
1549  
1550  
1551  
1552  
1553  
1554  
1555  
1556  
1557  
1558  
1559  
1560  
1561  
1562  
1563  
1564  
1565

1566  
1567  
1568  
1569  
1570  
1571  
1572  
1573  
1574  
1575  
1576  
1577  
1578  
1579  
1580  
1581  
1582  
1583  
1584  
1585  
1586  
1587  
1588  
1589  
1590  
1591  
1592  
1593  
1594  
1595  
1596  
1597  
1598  
1599  
1600  
1601  
1602  
1603  
1604  
1605  
1606  
1607  
1608  
1609  
1610  
1611  
1612  
1613  
1614  
1615  
1616  
1617  
1618  
1619

### Task: Guess the model output (Scenes A/B/C/D)

For each photo, the model predicts one of four scenes. Your job is to guess the model output for the given photo on the left.

To help you understand how the model makes its predictions, for each scene, we show example photos for which the model predicts that scene. Scroll right to see all 10 example photos.

Based on these examples, choose the scene you think the model will predict for the given photo. We show the photo 4 times so you can easily compare it to the examples on the right.

Photo



Photo (copy)



Photo (copy)



Photo (copy)



Examples predicted Scene A



Examples predicted Scene B



Examples predicted Scene C



Examples predicted Scene D



Q. Which scene class do you think the model predicts?

Scene A  Scene B  Scene C  Scene D

Click "Next Photo" after selecting the rows and answering the question.

2 / 10

Next Photo

Figure 11. UI - Part 1: Guess the model output (example-based explanations)

## Simplicity-Correctness Tradeoff

So far we have only shown photos where the scene with the highest explanation score matches the scene the model predicts.

However, this is not always the case, and you can choose the level of **simplicity** and **correctness** of concept-based explanation.

**Simplicity** refers to the number of concepts used in a given set of explanations.

**Correctness** refers to the percentage of times the explanations correctly explain the model prediction.

For reference, we show how explanations for scene **embassy** look when they use different number of concepts.

| Up to 4 concepts | Up to 8 concepts  | Up to 16 concepts    | Up to 32 concepts    | Up to 64 concepts      |
|------------------|-------------------|----------------------|----------------------|------------------------|
| embassy =        | embassy =         | embassy =            | embassy =            | embassy =              |
| - 0.39 sky       | - 1.16 sky        | - 2.88 sky           | - 3.46 sky           | - 12.92 wall           |
| + 0.33           | - 1.15 grass      | + 1.49 grass         | + 1.99 road          | + 10.43 sky            |
|                  | - 0.24 car        | + 1.48 plant         | + 1.65 grass         | + 8.83 floor           |
|                  | + 0.24 skyscraper | - 1.30 car           | - 1.37 plant         | + 6.41 windowpane      |
|                  | + 1.29            | + 0.68 streetlight   | + 1.09 car           | + 5.92 tree            |
|                  |                   | - 0.60 stairway      | + 0.81 sidewalk      | - 5.87 building        |
|                  |                   | - 0.55 truck         | - 0.78 mountain      | - 5.69 person          |
|                  |                   | + 0.53 awning        | - 0.72 fence         | - 5.60 door            |
|                  |                   | - 0.22 traffic light | + 0.52 streetlight   | - 5.59 table           |
|                  |                   | + 0.19 flag          | - 0.46 box           | + 5.51 road            |
|                  |                   | - 0.08 palm          | + 0.36 rock          | - 4.29 grass           |
|                  |                   | + 0.07 skyscraper    | - 0.34 flowerpot     | - 4.09 plant           |
|                  |                   | + 2.36               | + 0.28 ashcan        | - 3.44 chair           |
|                  |                   |                      | - 0.25 spotlight     | + 3.02 car             |
|                  |                   |                      | - 0.18 stairway      | + 2.87 painting        |
|                  |                   |                      | - 0.16 van           | - 2.79 carpet          |
|                  |                   |                      | + 0.14 truck         | - 2.29 sidewalk        |
|                  |                   |                      | - 0.09 awning        | + 2.26 signboard       |
|                  |                   |                      | - 0.08 traffic light | - 1.92 mirror          |
|                  |                   |                      | + 0.04 flag          | - 1.80 lamp            |
|                  |                   |                      | - 0.03 palm          | + 1.66 curtain         |
|                  |                   |                      | + 0.02 skyscraper    | + 1.56 pole            |
|                  |                   |                      | + 3.12               | - 1.54 mountain        |
|                  |                   |                      |                      | + 1.54 fence           |
|                  |                   |                      |                      | - 1.51 streetlight     |
|                  |                   |                      |                      | + 1.41 box             |
|                  |                   |                      |                      | + 1.37 earth           |
|                  |                   |                      |                      | - 1.32 water           |
|                  |                   |                      |                      | + 1.31 railing         |
|                  |                   |                      |                      | - 1.31 flower          |
|                  |                   |                      |                      | + 1.24 rock            |
|                  |                   |                      |                      | + 1.16 pot             |
|                  |                   |                      |                      | + 1.13 flowerpot       |
|                  |                   |                      |                      | - 0.99 stairs          |
|                  |                   |                      |                      | + 0.92 clock           |
|                  |                   |                      |                      | + 0.83 bag             |
|                  |                   |                      |                      | - 0.82 pillar          |
|                  |                   |                      |                      | - 0.80 bicycle         |
|                  |                   |                      |                      | + 0.77 ashcan          |
|                  |                   |                      |                      | + 0.76 bench           |
|                  |                   |                      |                      | + 0.60 spotlight       |
|                  |                   |                      |                      | - 0.56 basket          |
|                  |                   |                      |                      | + 0.55 path            |
|                  |                   |                      |                      | - 0.54 stairway        |
|                  |                   |                      |                      | + 0.54 van             |
|                  |                   |                      |                      | - 0.46 truck           |
|                  |                   |                      |                      | - 0.41 awning          |
|                  |                   |                      |                      | - 0.33 traffic light   |
|                  |                   |                      |                      | - 0.33 bannister       |
|                  |                   |                      |                      | + 0.33 poster          |
|                  |                   |                      |                      | - 0.31 flag            |
|                  |                   |                      |                      | - 0.25 drinking glass  |
|                  |                   |                      |                      | - 0.24 bucket          |
|                  |                   |                      |                      | - 0.23 pedestal        |
|                  |                   |                      |                      | - 0.20 trade name      |
|                  |                   |                      |                      | + 0.10 palm            |
|                  |                   |                      |                      | + 0.06 air conditioner |
|                  |                   |                      |                      | - 0.03 skyscraper      |
|                  |                   |                      |                      | + 7.70                 |

Below is a plot that visualizes the tradeoff between simplicity and correctness. Overall, we see that explanations that use more concepts better explain model predictions.

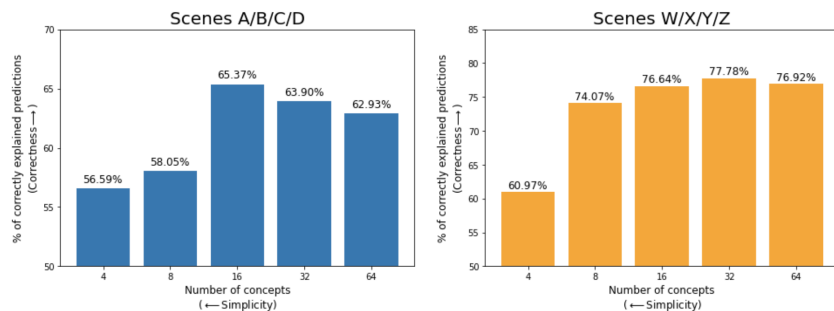

### Q. Which would you prefer?

- Explanations that use up to 4 concepts
- Explanations that use up to 8 concepts
- Explanations that use up to 16 concepts
- Explanations that use up to 32 concepts
- Explanations that use up to 64 concepts

Briefly describe the reason for your choice.



1728  
1729  
1730  
1731  
1732  
1733  
1734  
1735  
1736  
1737  
1738  
1739  
1740  
1741  
1742  
1743  
1744  
1745  
1746  
1747  
1748  
1749  
1750  
1751  
1752  
1753  
1754  
1755  
1756  
1757  
1758  
1759  
1760  
1761  
1762  
1763  
1764  
1765  
1766  
1767  
1768  
1769  
1770  
1771  
1772  
1773  
1774  
1775  
1776  
1777  
1778  
1779  
1780  
1781

1782  
1783  
1784  
1785  
1786  
1787  
1788  
1789  
1790  
1791  
1792  
1793  
1794  
1795  
1796  
1797  
1798  
1799  
1800  
1801  
1802  
1803  
1804  
1805  
1806  
1807  
1808  
1809  
1810  
1811  
1812  
1813  
1814  
1815  
1816  
1817  
1818  
1819  
1820  
1821  
1822  
1823  
1824  
1825  
1826  
1827  
1828  
1829  
1830  
1831  
1832  
1833  
1834  
1835

Thank you for your participation!

Let us know if you have any feedback about this study.

Submit

Figure 13. UI - Feedback
